# Supplementary material for: Checkpoint-dependent RNR induction promotes fork restart after replicative stress
Source: PubMed Central journal article supplement — Sci Rep. 2015 Jan 20;5:7886. doi: 10.1038/srep07886 (PMC4298733; doi:10.1038/srep07886), 2015-01-20
Supplement: srep07886-s1.pdf [file srep07886-s1.pdf]

# **Checkpoint-dependent RNR induction promotes fork restart after replicative stress**

Esther C. Morafraila<sup>1</sup>, John F. X. Diffley<sup>2</sup>, José Antonio Tercero<sup>3\*</sup> and  
Mónica Segurado<sup>1,2,3\*</sup>

<sup>1</sup> Instituto de Biología Funcional y Genómica and Departamento de Microbiología y  
Genética, (CSIC/USAL),

Campus Miguel de Unamuno, Salamanca 37007, Spain

<sup>2</sup> Cancer Research UK London Research Institute, Clare Hall Laboratories, South  
Mimms, Herts. EN6 3LD, United Kingdom

<sup>3</sup> Centro de Biología Molecular Severo Ochoa (CSIC/UAM), Cantoblanco, 28049  
Madrid, Spain

\* Corresponding authors:

monicas@usal.es

jatercero@cbm.csic.es

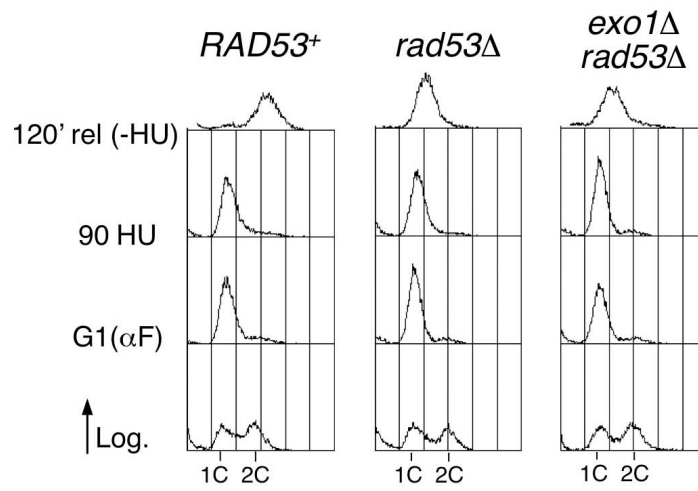

**Supplementary Fig. S1.** Analysis of replication resumption in *RAD53+*, *rad53Δ* and *rad53Δexo1Δ* strains after HU treatment. The experiment was performed as described in Fig. 1c. DNA samples of the specified strains were taken at the indicated time points and DNA content was determined by flow cytometry.

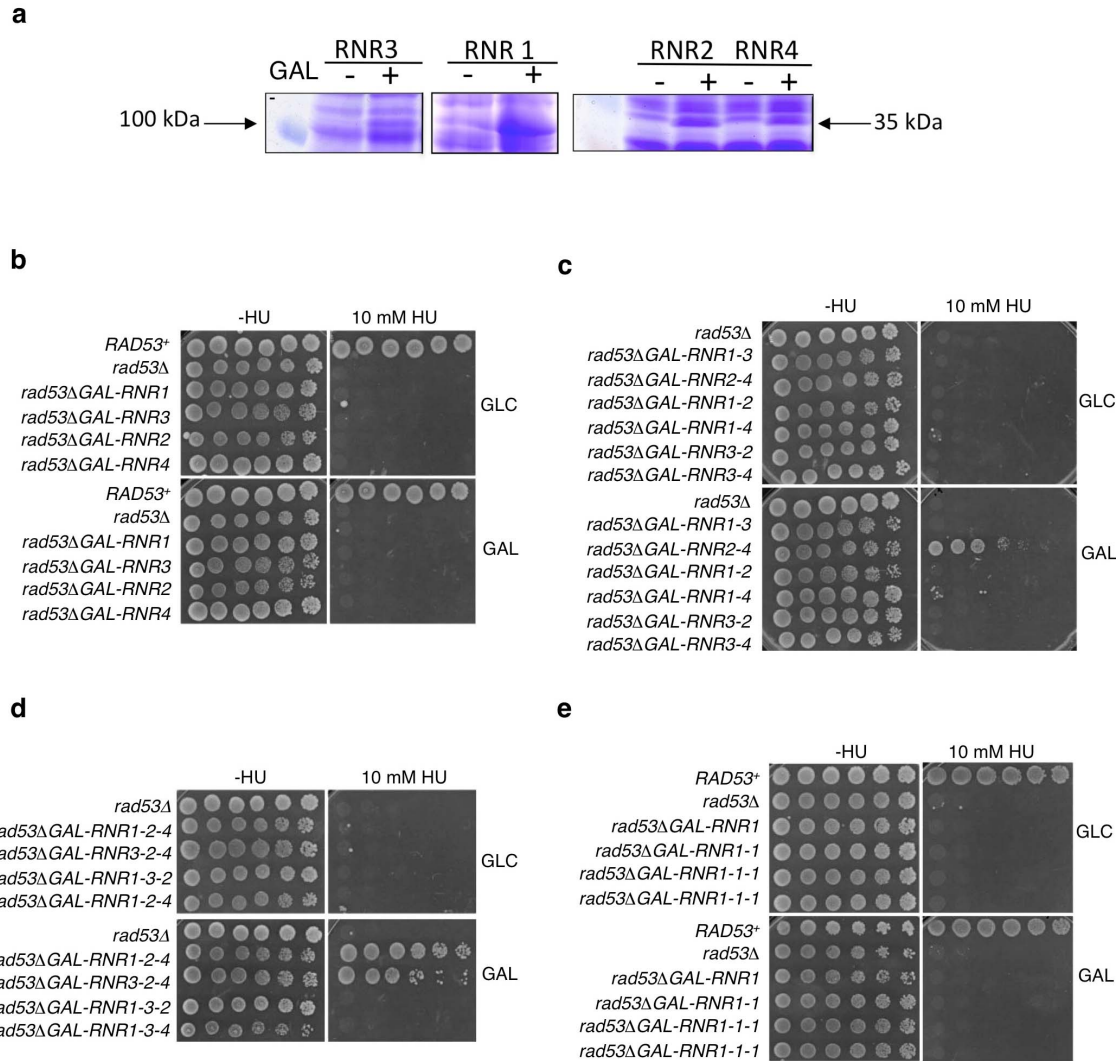

**Supplementary Fig. S2.** Effect of *RNR* induction on viability in the presence of HU.

(a) Expression of the different RNR subunits was examined upon induction/repression of the GAL1 promoter. Protein extracts from cultures grown overnight in YP supplemented with glucose or galactose were separated by 7.5% and 12% SDS-PAGE and stained with Coomassie Blue. (b) 1:5 serial dilutions of exponential cultures of the indicated strains were tested for sensitivity to HU in YPD plates (top) or YPGAL plates (bottom) by using a drop assay on plates. (c) Drop assays of the indicated strains as described in (b). (d) HU-sensitivity of the indicated strains was tested as described in (b). (e) Drop assays of the indicated strains as described in (b).

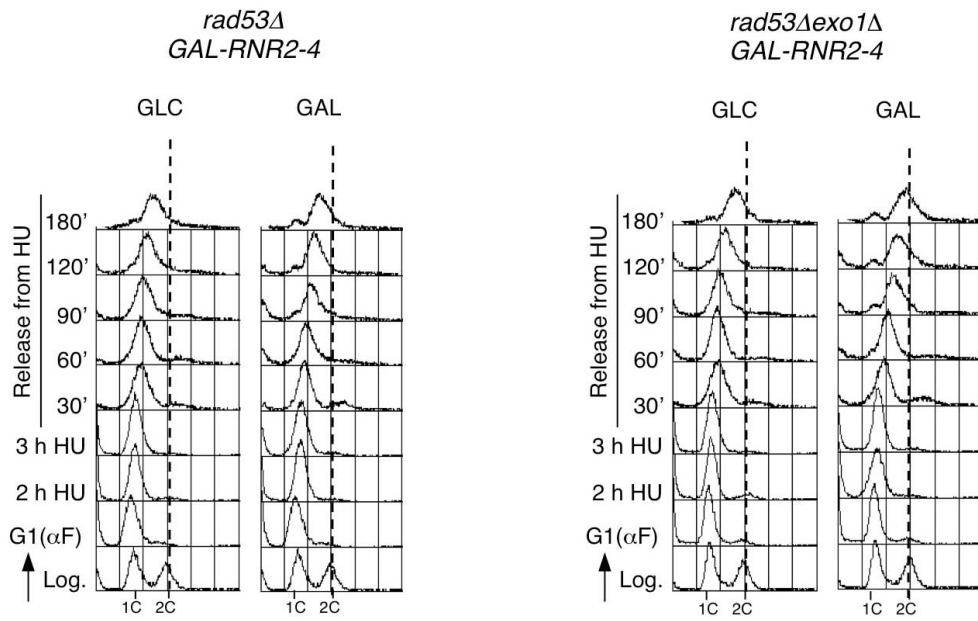

**Supplementary Fig. S3.** Effect of *RNR2-4* induction and *EXO1* deletion on replication restart in *rad53Δexo1Δ* mutants after fork stalling. Cultures of *rad53ΔGAL-RNR2-4* and *rad53Δexo1Δ GAL-RNR2-4* strains were grown in YPRAF medium, arrested in G1 with  $\alpha$ -factor, and released into fresh medium in the presence of 0.2 M HU for 3 hours. After that, cultures were released into fresh medium in the presence of Glc (left panel) or Gal (right panel). DNA content was measured by flow cytometry at the indicated times.

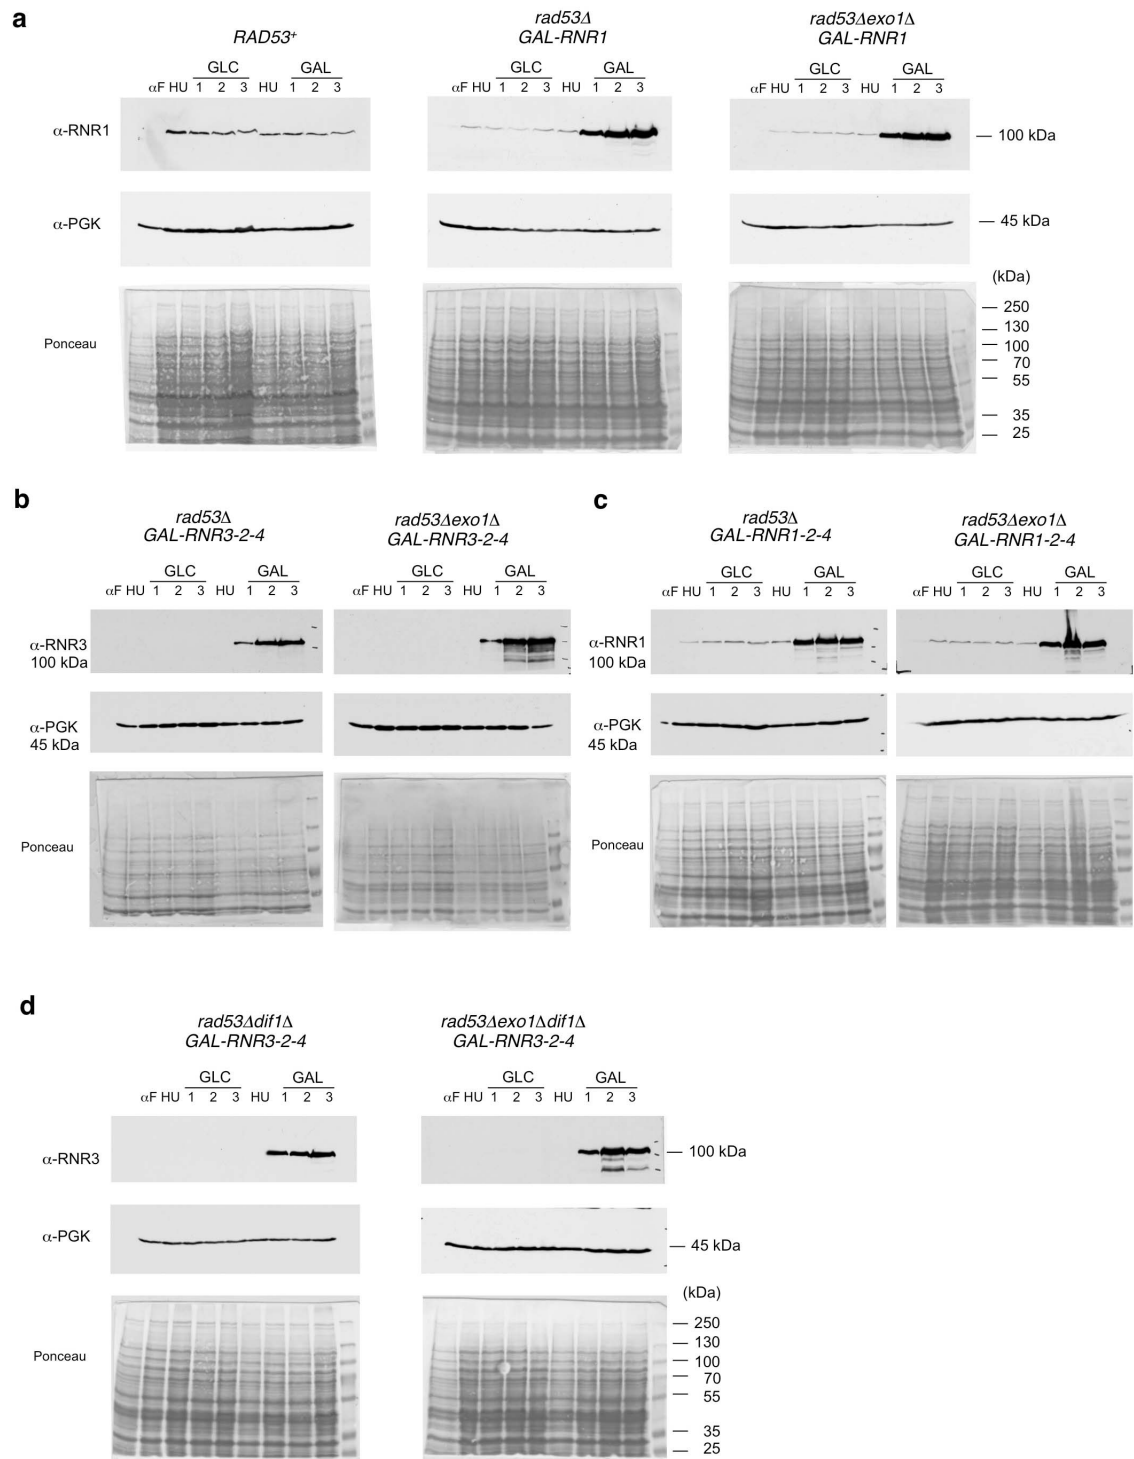

**Supplementary Fig. S4.** Full-length images of western blots. (a), (b), (c) Full-length western blots in Fig. 3a, Fig. 3b and Fig. 3c respectively are shown. (d) Full-length western blots in Fig. 3e are shown. All gels have been run under the same experimental conditions.

## Supplementary Table S1. *S. cerevisiae* strains used in this study

All the strains used in this work are derived from W303 (*ade2-1 ura3-1 his3-11,15 trp1-1 leu2-3,112 can1-100*)

| Strain | Genotype                                                                                                                                                                              | Source                    |
|--------|---------------------------------------------------------------------------------------------------------------------------------------------------------------------------------------|---------------------------|
| YJT72  | <i>MATa sml1Δ::URA3</i>                                                                                                                                                               | Tercero and Diffley, 2001 |
| YJT75  | <i>MATa sml1Δ::URA3 rad53Δ::LEU2</i>                                                                                                                                                  | Tercero and Diffley, 2001 |
| YMS666 | <i>MATa sml1Δ::URA3 rad53Δ::LEU2 exo1Δ::HIS3</i>                                                                                                                                      | This work                 |
| YEC514 | <i>MATa sml1Δ::kanMX rad53Δ::natNT2 ura3::pRS306-GAL-RNR1-URA3</i>                                                                                                                    | This work                 |
| YEC397 | <i>MATa sml1Δ::kanMX rad53Δ::natNT2 his3::pRS303-GAL-RNR3-HIS3</i>                                                                                                                    | This work                 |
| YEC398 | <i>MATa sml1Δ::kanMX rad53Δ::natNT2 trp1::pRS304-GAL-RNR2-TRP1</i>                                                                                                                    | This work                 |
| YEC393 | <i>MATa sml1Δ::kanMX rad53Δ::natNT2 leu2::pRS305-GAL-RNR4-LEU2</i>                                                                                                                    | This work                 |
| YEC520 | <i>MATa sml1Δ::kanMX rad53Δ::natNT2 ura3::pRS306-GAL-RNR1-URA3</i><br><i>his3::pRS303-GAL-RNR3-HIS3</i>                                                                               | This work                 |
| YEC535 | <i>MATa sml1Δ::kanMX rad53Δ::natNT2 trp1::pRS304-GAL-RNR2-TRP1</i><br><i>leu2::pRS305-GAL-RNR4-LEU2</i>                                                                               | This work                 |
| YEC515 | <i>MATa sml1Δ::kanMX rad53Δ::natNT2 ura3::pRS306-GAL-RNR1-URA3</i><br><i>trp1::pRS304-GAL-RNR2-TRP1</i>                                                                               | This work                 |
| YEC518 | <i>MATa sml1Δ::kanMX rad53Δ::natNT2 ura3::pRS306-GAL-RNR1-URA3</i><br><i>leu2::pRS305-GAL-RNR4-LEU2</i>                                                                               | This work                 |
| YEC405 | <i>MATa sml1Δ::kanMX rad53Δ::natNT2 trp1::pRS304-GAL-RNR2-TRP1</i><br><i>his3::pRS303-GAL-RNR3-HIS3</i>                                                                               | This work                 |
| YEC414 | <i>MATa sml1Δ::kanMX rad53Δ::natNT2 his3::pRS303-GAL-RNR3-HIS3</i><br><i>leu2::pRS305-GAL-RNR4-LEU2</i>                                                                               | This work                 |
| YEC553 | <i>MATa sml1Δ::kanMX rad53Δ::natNT2 ura3::pRS306-GAL-RNR1-URA3</i><br><i>trp1::pRS304-GAL-RNR2-TRP1 leu2::pRS305-GAL-RNR4-LEU2</i>                                                    | This work                 |
| YMS252 | <i>MATa sml1Δ::kanMX rad53Δ::natNT2 trp1::pRS304-GAL-RNR2-TRP1</i><br><i>his3::pRS303-GAL-RNR3-HIS3 leu2::pRS305-GAL-RNR4-LEU2</i>                                                    | This work                 |
| YEC513 | <i>MATa sml1Δ::kanMX rad53Δ::natNT2 ura3::pRS306-GAL-RNR1-URA3</i><br><i>trp1::pRS304-GAL-RNR2-TRP1 his3::pRS303-GAL-RNR3-HIS3</i>                                                    | This work                 |
| YEC519 | <i>MATa sml1Δ::kanMX rad53Δ::natNT2 ura3::pRS306-GAL-RNR1-URA3</i><br><i>his3::pRS303-GAL-RNR3-HIS3 leu2::pRS305-GAL-RNR4-LEU2</i>                                                    | This work                 |
| YEC685 | <i>MATa sml1Δ::kanMX rad53Δ::natNT2 trp1::pRS304-GAL-RNR1-TRP1</i><br><i>his3::pRS303-GAL-RNR1-HIS3</i>                                                                               | This work                 |
| YEC688 | <i>MATa sml1Δ::kanMX rad53Δ::natNT2 ura3::pRS306-GAL-RNR1-URA3</i><br><i>his3::pRS303-GAL-RNR1-HIS3</i>                                                                               | This work                 |
| YEC691 | <i>MATa sml1Δ::kanMX rad53Δ::natNT2 ura3::pRS306-GAL-RNR1-URA3</i><br><i>trp1::pRS304-GAL-RNR1-TRP1 his3::pRS303-GAL-RNR1-HIS3</i>                                                    | This work                 |
| YEC532 | <i>MATa sml1Δ::kanMX rad53Δ::natNT2 ura3::pRS306-GAL-RNR1-URA3</i><br><i>exo1Δ:: hghMX</i>                                                                                            | This work                 |
| YEC536 | <i>MATa sml1Δ::kanMX rad53Δ::natNT2 trp1::pRS304-GAL-RNR2-TRP1</i><br><i>leu2::pRS305-GAL-RNR4-LEU2 exo1Δ:: hghMX</i>                                                                 | This work                 |
| YMS349 | <i>MATa sml1Δ::kanMX rad53Δ::natNT2 trp1::pRS304-GAL-RNR2-TRP1</i><br><i>his3::pRS303-GAL-RNR3-HIS3 leu2::pRS305-GAL-RNR4-LEU2 exo1Δ::</i><br><i>hghMX</i>                            | This work                 |
| YEC554 | <i>MATa sml1Δ::kanMX rad53Δ::natNT2 ura3::pRS306-GAL-RNR1-URA3</i><br><i>trp1::pRS304-GAL-RNR2-TRP1 leu2::pRS305-GAL-RNR4-LEU2</i><br><i>exo1Δ:: hghMX</i>                            | This work                 |
| YMS260 | <i>MATa sml1Δ::kanMX rad53Δ::natNT2 trp1::pRS304-GAL-RNR2-TRP1</i><br><i>his3::pRS303-GAL-RNR3-HIS3 leu2::pRS305-GAL-RNR4-LEU2</i><br><i>exo1Δ:: hghMX dif1Δ::URA3</i>                | This work                 |
| YEC561 | <i>MATa sml1Δ::kanMX rad53Δ::natNT2 ura3::pRS306-GAL-RNR1-URA3</i><br><i>trp1::pRS304-GAL-RNR2-TRP1 leu2::pRS305-GAL-RNR4-LEU2</i><br><i>exo1Δ:: hghMX dif1Δ::URA3</i>                | This work                 |
| YMS346 | <i>MATa sml1Δ::kanMX rad53Δ::natNT2 trp1::pRS304-GAL-RNR2-TRP1</i><br><i>his3::pRS303-GAL-RNR3-HIS3 leu2::pRS305-GAL-RNR4-LEU2</i><br><i>dif1Δ::URA3</i>                              | This work                 |
| YMS269 | <i>MATa sml1Δ::kanMX rad53Δ::natNT2 exo1Δ::hghMX</i><br><i>his3::pRS303-GAL-RNR3-HIS3 leu2::pRS305-GAL-RNR4-LEU2</i><br><i>trp1::pRS304-GAL-RNR2-TRP1 ARS608Δ::URA3 ARS609Δ::ADE2</i> | This work                 |
